# Supplementary material for: A Versatile Panel of Reference Gene Assays for the Measurement of Chicken mRNA by Quantitative PCR
Source: PubMed Central journal article supplement (PMC4990416; doi:10.1371/journal.pone.0160173), 2016-08-18

experiment data file

| virus | ifa | rep | actb  | b2m   | hmbs  | hpert1 | pgk1  | pla2  | ppia  | rpl13 | rplp0 | tbp   | rrna  |
|-------|-----|-----|-------|-------|-------|--------|-------|-------|-------|-------|-------|-------|-------|
| u     | c   | a   | 18.98 | 25.05 | 27.84 | 24.45  | 20.59 | 26.13 | 22.39 | 22.26 | 19.79 | 25.91 | 14.56 |
| u     | c   | b   | 19.21 | 25.36 | 27.93 | 24.81  | 20.74 | 26.44 | 22.07 | 22.70 | 19.87 | 25.99 | 15.17 |
| u     | c   | c   | 19.22 | 25.76 | 28.28 | 24.84  | 21.12 | 26.91 | 22.40 | 22.76 | 20.04 | 26.30 | 15.01 |
| u     | c   | d   | 20.07 | 25.74 | 28.58 | 25.31  | 21.17 | 27.13 | 22.53 | 22.85 | 20.46 | 26.54 | 15.28 |
| u     | a   | a   | 19.94 | 24.69 | 28.38 | 25.07  | 21.40 | 26.95 | 22.60 | 22.81 | 20.43 | 26.36 | 15.46 |
| u     | a   | b   | 19.80 | 24.22 | 28.11 | 25.02  | 21.43 | 26.77 | 22.56 | 22.63 | 20.27 | 26.07 | 15.15 |
| u     | a   | c   | 19.47 | 23.93 | 27.80 | 24.57  | 20.77 | 26.34 | 22.06 | 22.21 | 19.87 | 25.96 | 14.72 |
| u     | a   | d   | 20.51 | 25.45 | 29.04 | 25.79  | 22.08 | 27.97 | 22.87 | 23.45 | 20.95 | 27.00 | 16.15 |
| i     | a   | a   | 20.82 | 26.09 | 28.98 | 26.06  | 22.31 | 27.72 | 23.10 | 23.33 | 20.99 | 27.77 | 15.37 |
| i     | c   | b   | 20.37 | 25.83 | 28.46 | 25.60  | 21.68 | 27.38 | 22.62 | 22.79 | 20.71 | 27.19 | 15.09 |
| i     | c   | c   | 20.88 | 26.83 | 29.16 | 26.33  | 22.71 | 28.75 | 23.27 | 23.51 | 21.46 | 28.04 | 15.78 |
| i     | c   | d   | 19.98 | 25.70 | 28.09 | 25.44  | 21.72 | 27.86 | 22.50 | 22.54 | 20.46 | 27.59 | 14.71 |
| i     | a   | a   | 19.90 | 24.78 | 28.14 | 25.44  | 21.67 | 27.70 | 22.59 | 22.43 | 20.65 | 27.28 | 14.78 |
| i     | a   | b   | 20.51 | 24.30 | 28.41 | 25.85  | 22.18 | 27.63 | 23.51 | 23.06 | 21.12 | 27.37 | 15.19 |
| i     | a   | c   | 19.88 | 23.82 | 27.95 | 25.32  | 21.61 | 26.98 | 22.49 | 22.42 | 20.39 | 26.79 | 14.65 |
| i     | a   | d   | 20.48 | 25.29 | 28.64 | 25.99  | 22.36 | 28.42 | 23.11 | 23.05 | 21.34 | 27.79 | 15.34 |

standard curve data file

| conc    | actb  | b2m   | hmbs  | hpert1 | pgk1  | pla2  | ppia  | rpl13 | rplp0 | tbp   | rrna  |
|---------|-------|-------|-------|--------|-------|-------|-------|-------|-------|-------|-------|
| 1       | 17.68 | 17.96 | 24.13 | 20.73  | 18.88 | 22.32 | 19.78 | 17.62 | 15.92 | 23.86 | 4.77  |
| 0.1     | 21.31 | 21.24 | 28.08 | 24.26  | 22.20 | 25.96 | 22.75 | 21.09 | 19.54 | 27.26 | 7.47  |
| 0.01    | 24.86 | 24.75 | 31.29 | 27.69  | 25.67 | 29.39 | 26.01 | 24.54 | 22.93 | 30.69 | 12.25 |
| 0.001   | 28.53 | 28.70 | 34.38 | 31.37  | 29.34 | 32.99 | 29.78 | 27.90 | 26.53 | 33.94 | 15.96 |
| 0.0001  | 31.92 | 31.51 | 38.70 | 34.87  | 32.54 | 35.78 | 33.13 | 31.11 | 29.98 | 36.12 | 19.74 |
| 0.00001 | 35.30 | 35.22 | NA    | NA     | 35.34 | NA    | 36.37 | 33.68 | 33.21 | NA    | 23.47 |

```
x.stds<-read.table(filename,head=T,sep="\t")
```

```
x.slopes<-plot.stds(x.stds,...)
```

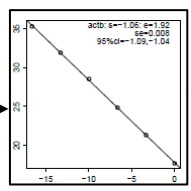

|        | slope      | effic    | stderr      | cilo      | cihi       |
|--------|------------|----------|-------------|-----------|------------|
| actb   | -1.0630659 | 1.919427 | 0.008292136 | -1.086089 | -1.0400433 |
| b2m    | -1.0412198 | 1.945866 | 0.018044248 | -1.091319 | -0.9911209 |
| hmbs   | -1.0668503 | 1.914992 | 0.035752091 | -1.180629 | -0.9530712 |
| hpert1 | -1.0653452 | 1.916751 | 0.005997980 | -1.084433 | -1.0462569 |
| pgk1   | -1.0062143 | 1.991457 | 0.019560916 | -1.060524 | -0.9519045 |
| pla2   | -1.0219968 | 1.970384 | 0.026336827 | -1.105812 | -0.9381813 |
| ppia   | -1.0136970 | 1.981356 | 0.015485365 | -1.056691 | -0.9707027 |
| rpl13  | -0.9780895 | 2.031297 | 0.023365855 | -1.042963 | -0.9132154 |
| rplp0  | -1.0438860 | 1.942560 | 0.008415665 | -1.067252 | -1.0205204 |
| tbp    | -0.9392136 | 2.091765 | 0.043203136 | -1.076705 | -0.8017219 |
| rrna   | -1.1526869 | 1.824547 | 0.031289551 | -1.239561 | -1.0658131 |

- Input data file
- R function execution
- R data object
- R library dependence
- Other analyses in R

```
x.aslog2<-raw2aslog2(x.raw,x.slopes)
```

| tissue | bird   | actb | b2m       | hmbs      | ...       |
|--------|--------|------|-----------|-----------|-----------|
| 1      | bursa  | a    | -19.09666 | -19.51314 | -25.79870 |
| 2      | bursa  | b    | -18.81072 | -19.50290 | -26.34340 |
| 3      | bursa  | c    | -18.82093 | -19.59504 | -25.86803 |
| 4      | bursa  | d    | -20.03617 | -20.65976 | -26.93761 |
| 5      | bursa  | e    | -18.57584 | -19.18553 | -26.15523 |
| 6      | bursa  | f    | -18.99453 | -18.99101 | -25.36295 |
| 7      | spleen | a    | -18.43287 | -19.15482 | -26.33350 |
| 8      | spleen | b    | -18.66775 | -18.84768 | -25.53131 |
| 9      | spleen | c    | -18.11629 | -18.77602 | -25.67986 |
| 10     | spleen | d    | -18.07544 | -18.19247 | -25.21440 |
| 11     | spleen | e    | -18.74944 | -19.42100 | -26.29388 |
| 12     | spleen | f    | -18.38181 | -19.13434 | -25.76899 |

gls model selection

NormqPCR

```
x.gn<-df2hkg(x.aslog2,...)
```

```
x.nf<-df2hkg(x.aslog2,...)
```

```
x.nd<-snfdrop(x.aslog2,...)
```

```
x.gn
```

```
x.nf
```

```
nfplot(x.nf)
```

```
gnplot(x.gn)
```

nlme multcomp

```
x.stats<-df2stats(x.aslog2,...)
```

asterisks = significant differences  
 coef = estimated mean log2 levels  
 stderr = standard errors  
 ci95lo = lower confidence intervals  
 ci95hi = upper confidence intervals  
 resid = residuals  
 refg = reference genes used  
 date = timestamp  
 call = parameter details

x.stats

```
plbars(x.stats,...)
```

```
plast(x.stats,...)
```

```
plres(x.stats,...)
```

```
shplot(x.nd,...)
```

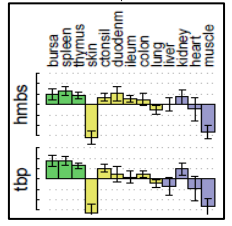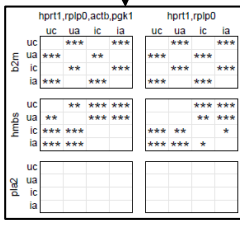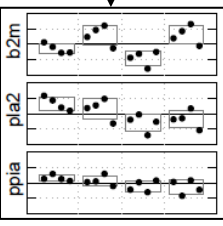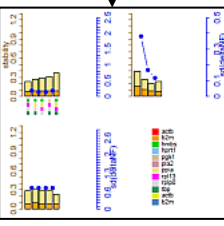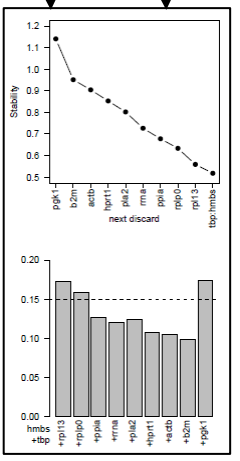

Supplement: pone.0160173.s001.pdf [file pone.0160173.s001.pdf]
