# Supplementary material for: A Versatile Panel of Reference Gene Assays for the Measurement of Chicken mRNA by Quantitative PCR
Source: PubMed Central journal article supplement (PMC4990416; doi:10.1371/journal.pone.0160173), 2016-08-18
Supplement: pone.0160173.s005.pdf [file pone.0160173.s005.pdf]

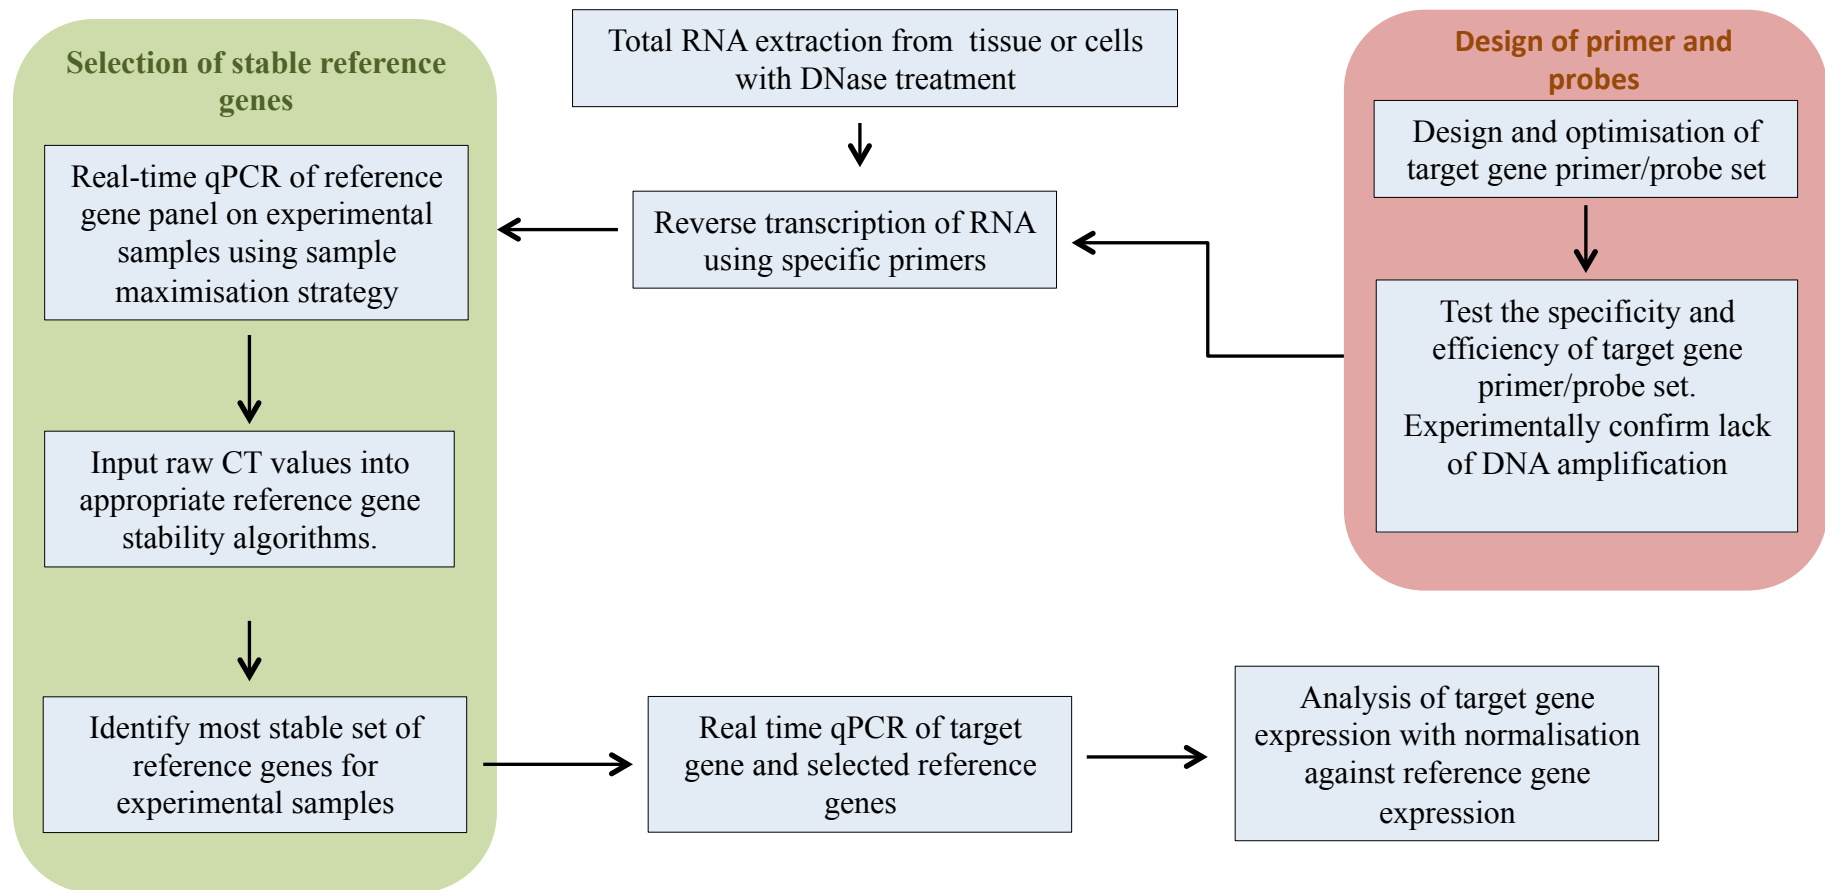

S5 Fig. Reference gene assay design and evaluation flowchart
